# Supplementary material for: Probability of sporadic lymphangioleiomyomatosis in women presenting with spontaneous pneumothorax
Source: Springer Nature journal article supplement (doi:10.1186/s13023-023-02784-5), 2023-07-06

PROBABILITY OF SPORADIC LYMPHANGIOLEIOMYOMATOSIS IN WOMEN  
PRESENTING WITH SPONTANEOUS PNEUMOTHORAX

**Supplementary material**

**Table of contents**

|                                                                                                                                                                            |    |
|----------------------------------------------------------------------------------------------------------------------------------------------------------------------------|----|
| Supplementary figure S1. PRISMA flow diagram for S-LAM epidemiology .....                                                                                                  | 2  |
| Supplementary figure S2. PRISMA flow diagram for SP epidemiology .....                                                                                                     | 3  |
| Supplementary figure S3. Incidence rate of SP in women stratified by period before/after July 2000.....                                                                    | 4  |
| Supplementary figure S4. Overall prevalence of SP in women.....                                                                                                            | 5  |
| Supplementary figure S5. Prevalence of SP in women stratified by period before/after July 2000.....                                                                        | 6  |
| Supplementary figure S6. PRISMA flow diagram for SP and PSP in women with S-LAM.....                                                                                       | 7  |
| Supplementary figure S7. Prevalence of SP in women with S-LAM .....                                                                                                        | 8  |
| Supplementary figure S8. PRISMA flow diagram for PSP epidemiology .....                                                                                                    | 9  |
| Supplementary figure S9. Incidence rate of PSP in women of the general population stratified by period before/after July 2000 .....                                        | 10 |
| Supplementary figure S10. Overall prevalence of PSP in women of the general population, with an average PSP duration of 30 days .....                                      | 11 |
| Supplementary figure S11. Prevalence of PSP in women of the general population, with an average PSP duration of 30 days, stratified by period before/after July 2000 ..... | 12 |
| Supplementary figure S 12. Prevalence of apparent PSP in women with S-LAM, with average duration of PSP of 30 days, random-effects model.....                              | 13 |

## Supplementary figure S1. PRISMA flow diagram for S-LAM epidemiology

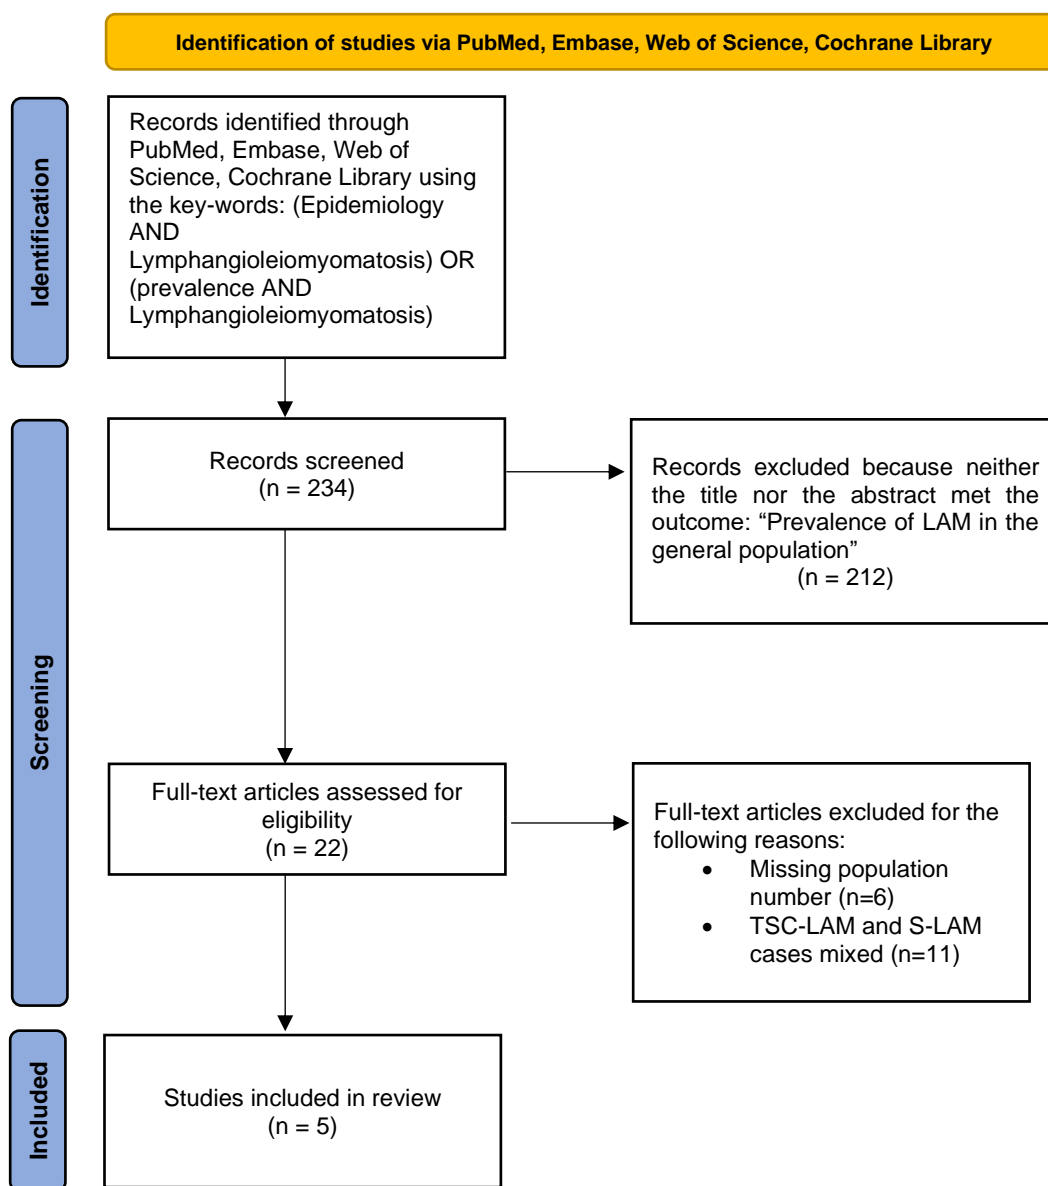

## Supplementary figure S2. PRISMA flow diagram for SP epidemiology

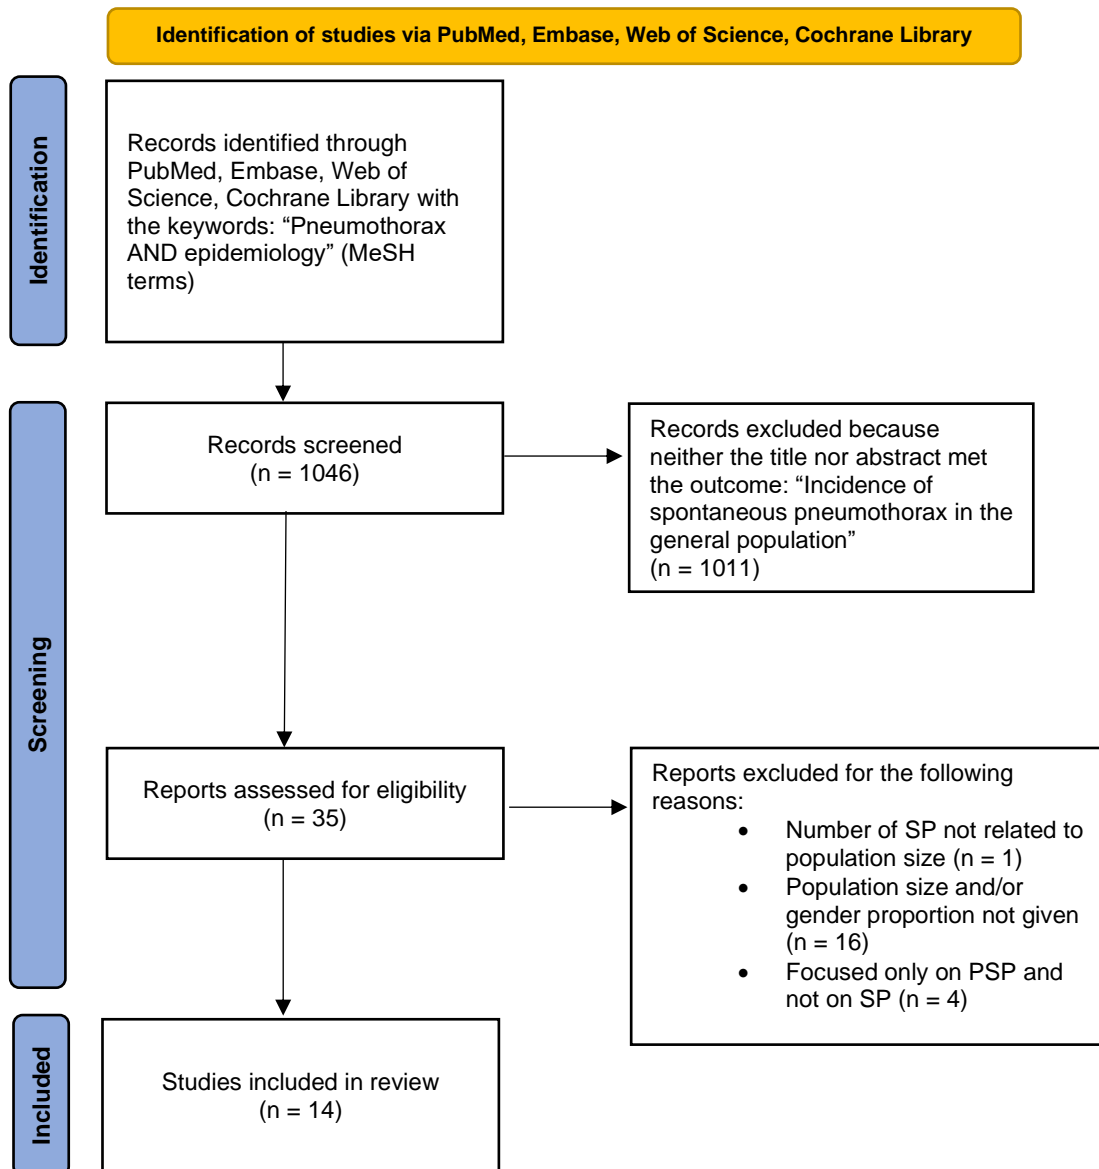

## Supplementary figure S3. Incidence rate of SP in women stratified by period before/after July 2000

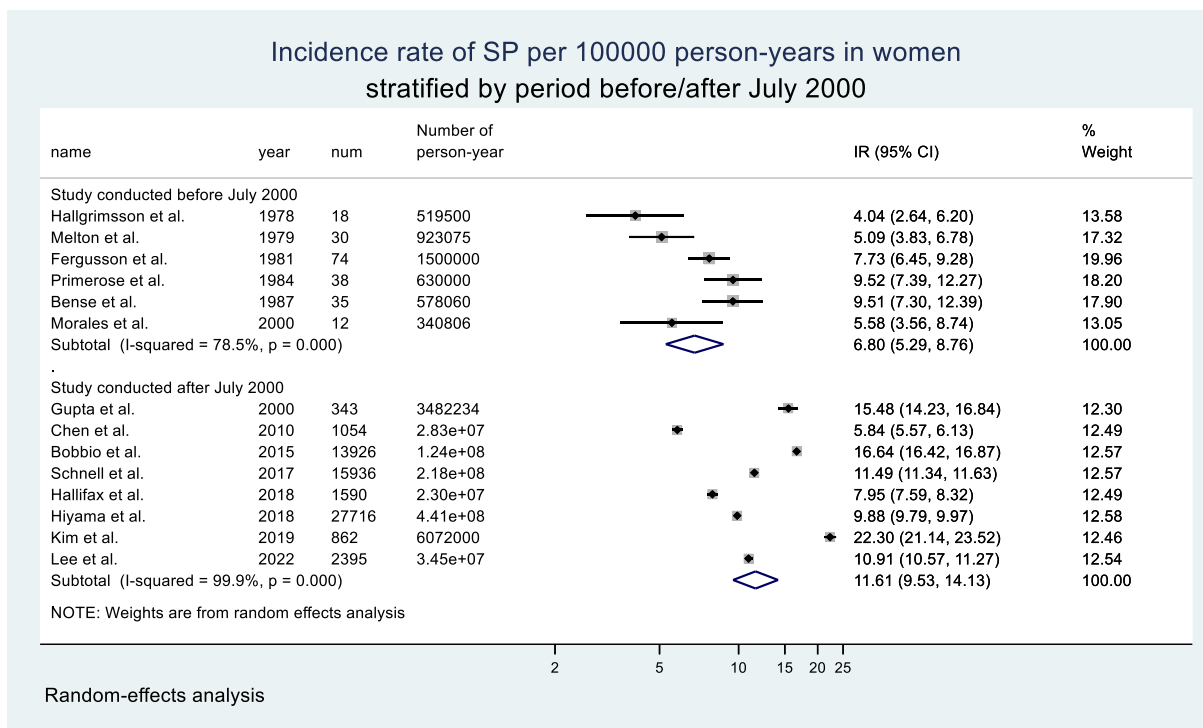

Supplementary figure S4. Overall prevalence of SP in women

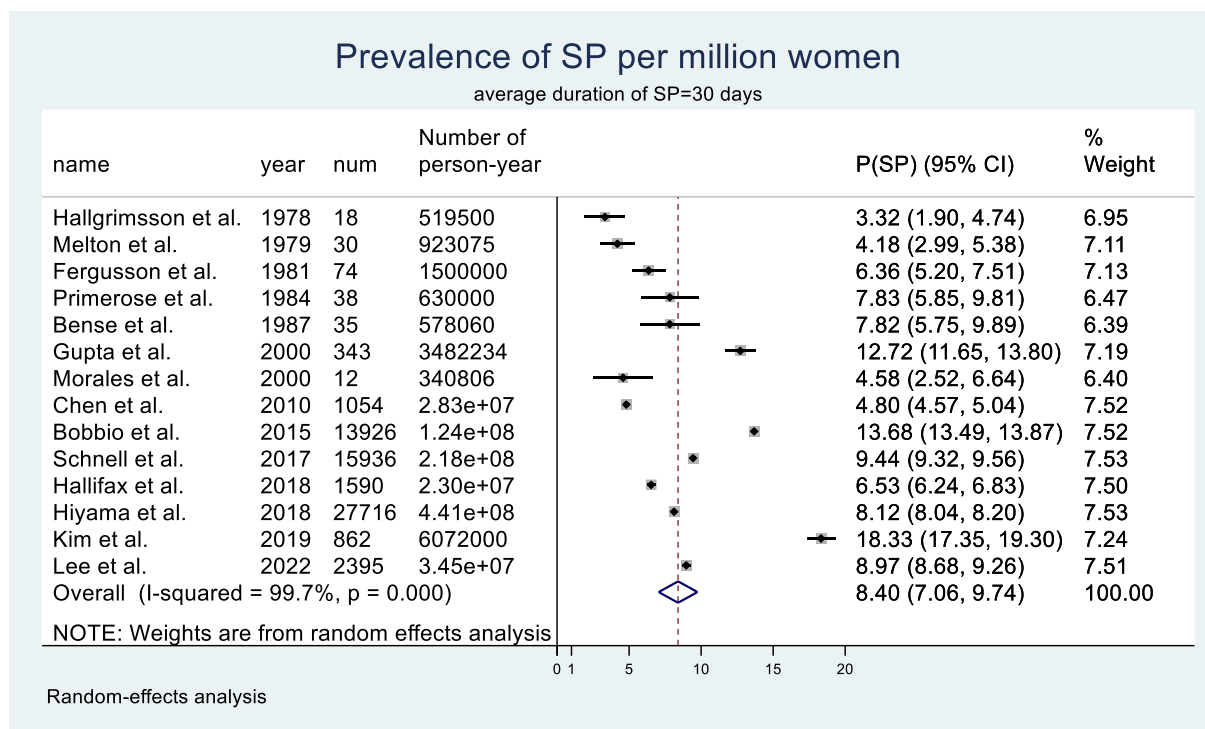

## Supplementary figure S5. Prevalence of SP in women stratified by period before/after July 2000

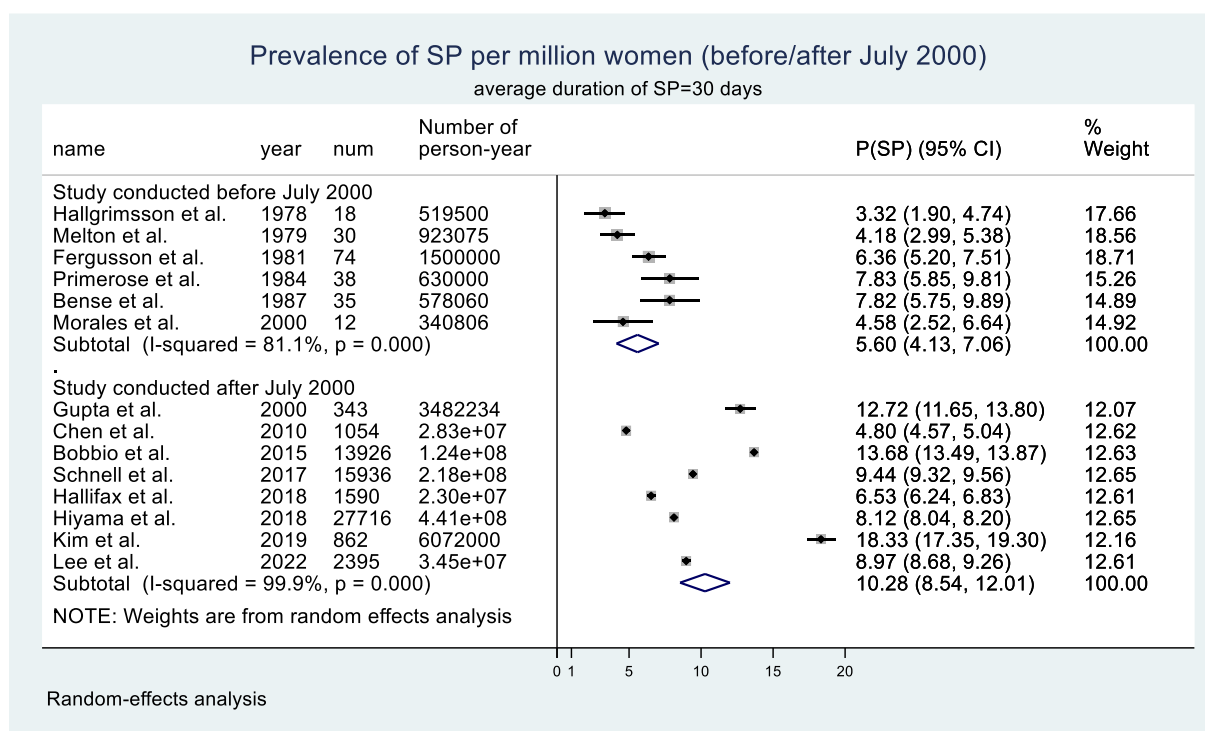

## Supplementary figure S6. PRISMA flow diagram for SP and PSP in women with S-LAM

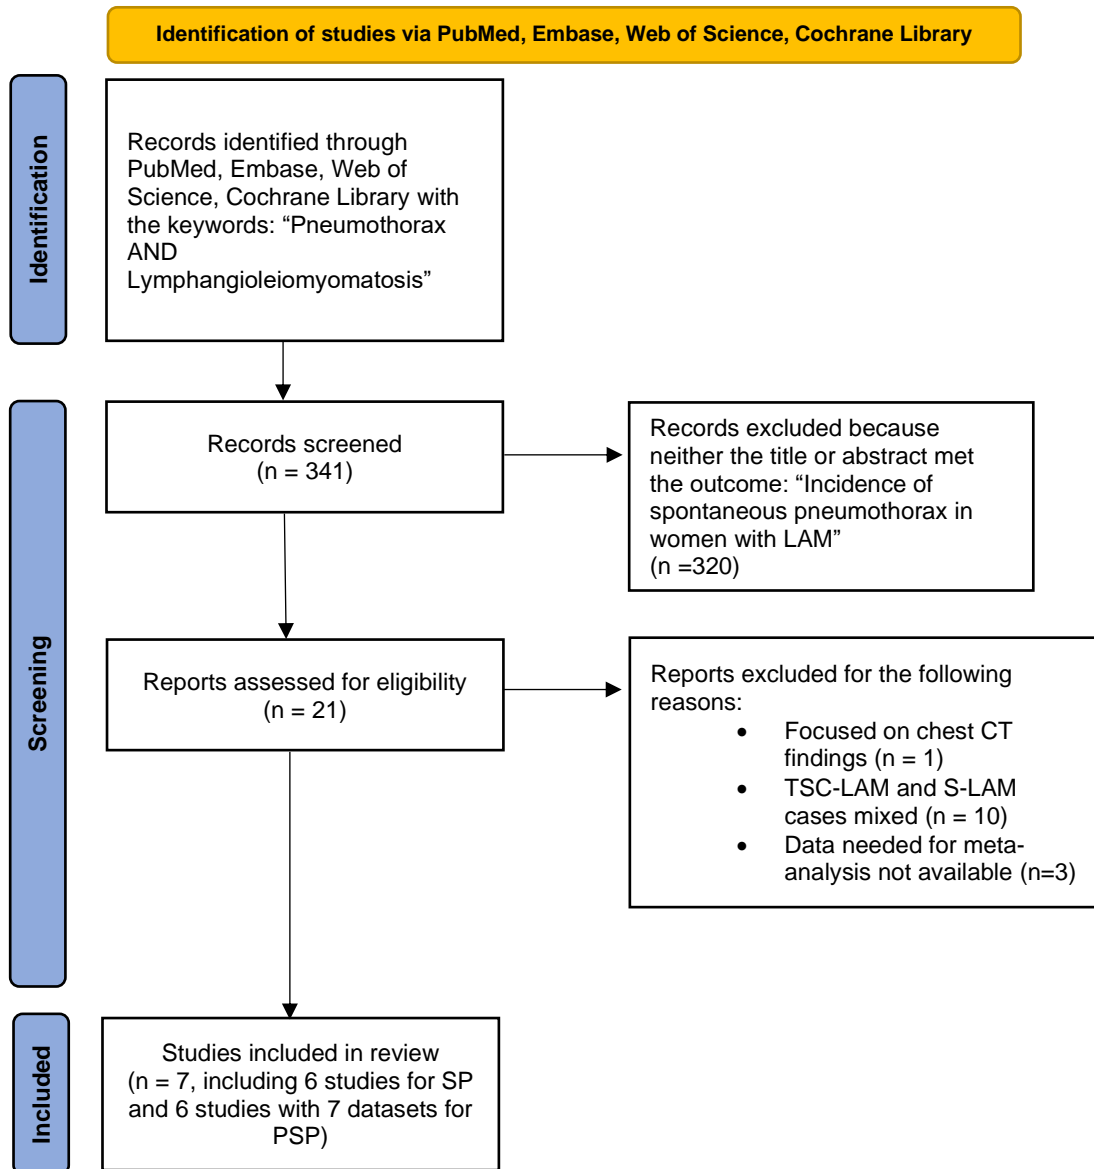

Supplementary figure S7. Prevalence of SP in women with S-LAM

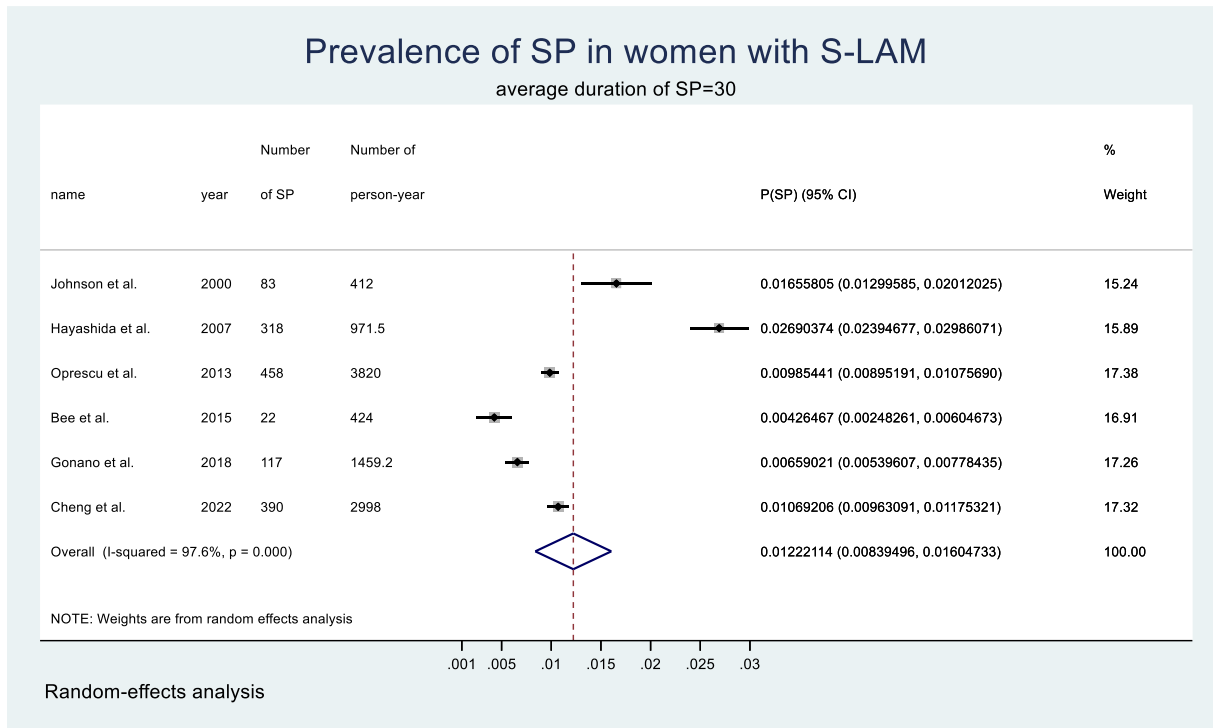



Supplementary figure S8. PRISMA flow diagram for PSP epidemiology

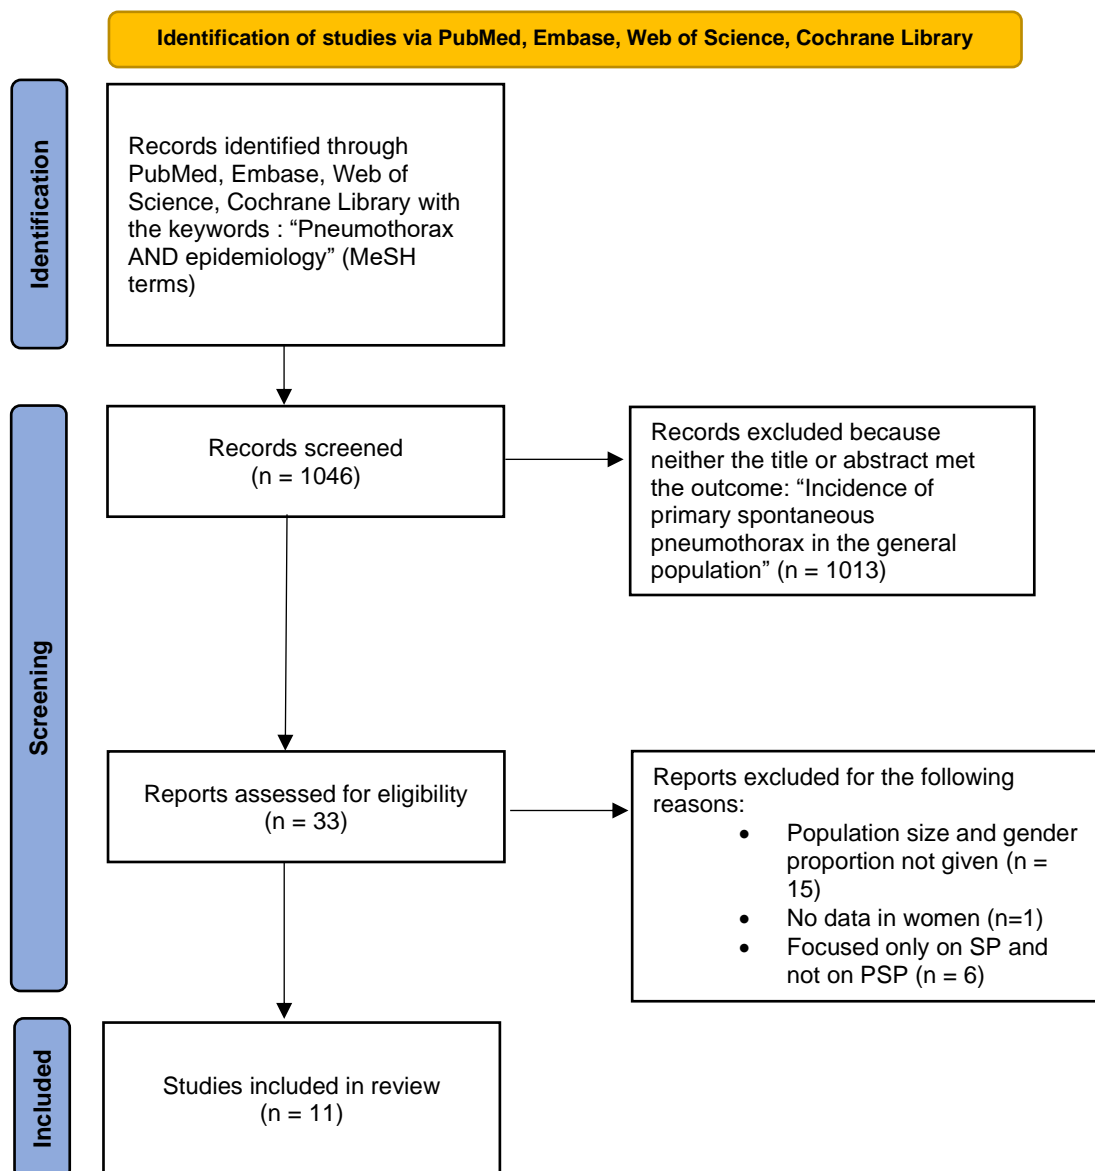

Supplementary figure S9. Incidence rate of PSP in women of the general population stratified by period before/after July 2000

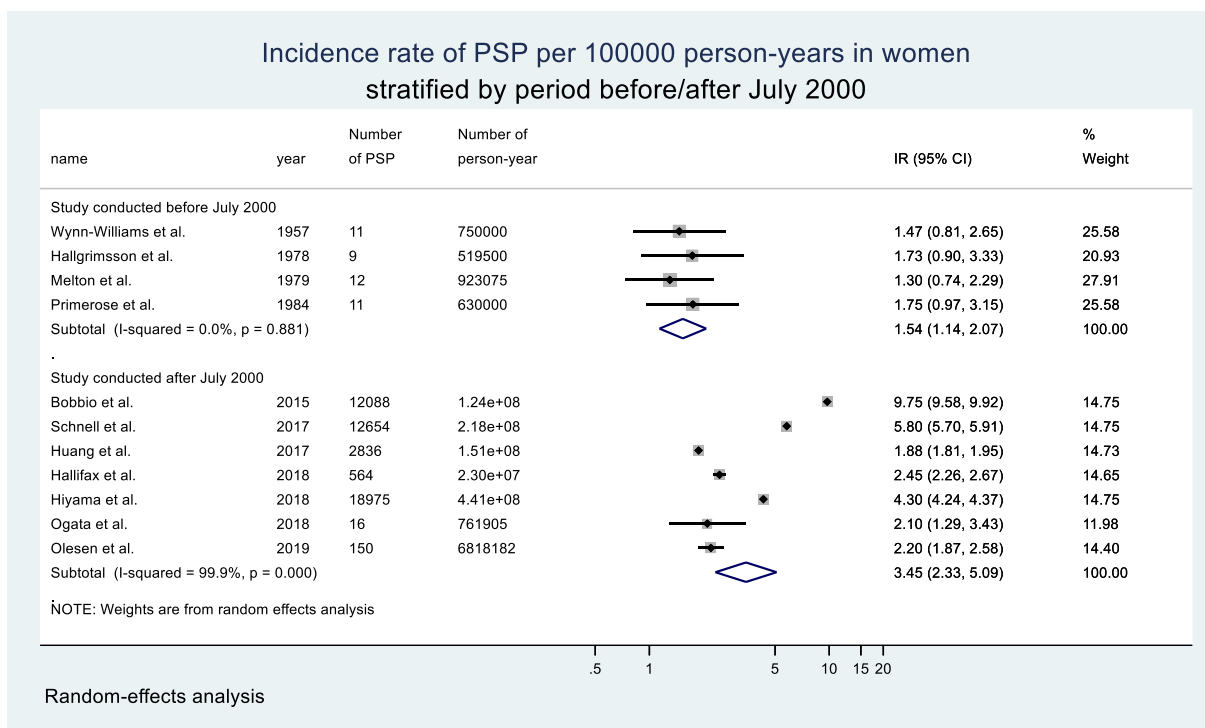

Supplementary figure S10. Overall prevalence of PSP in women of the general population, with an average PSP duration of 30 days

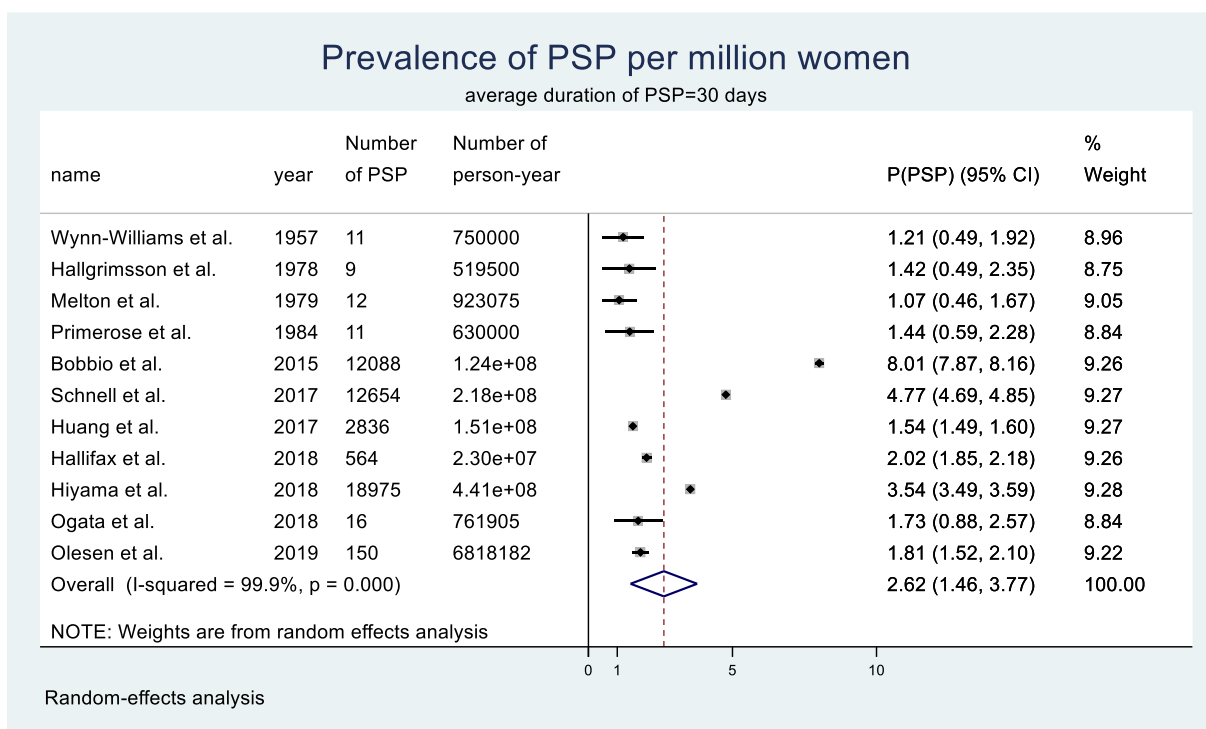

Supplementary figure S11. Prevalence of PSP in women of the general population, with an average PSP duration of 30 days, stratified by period before/after July 2000

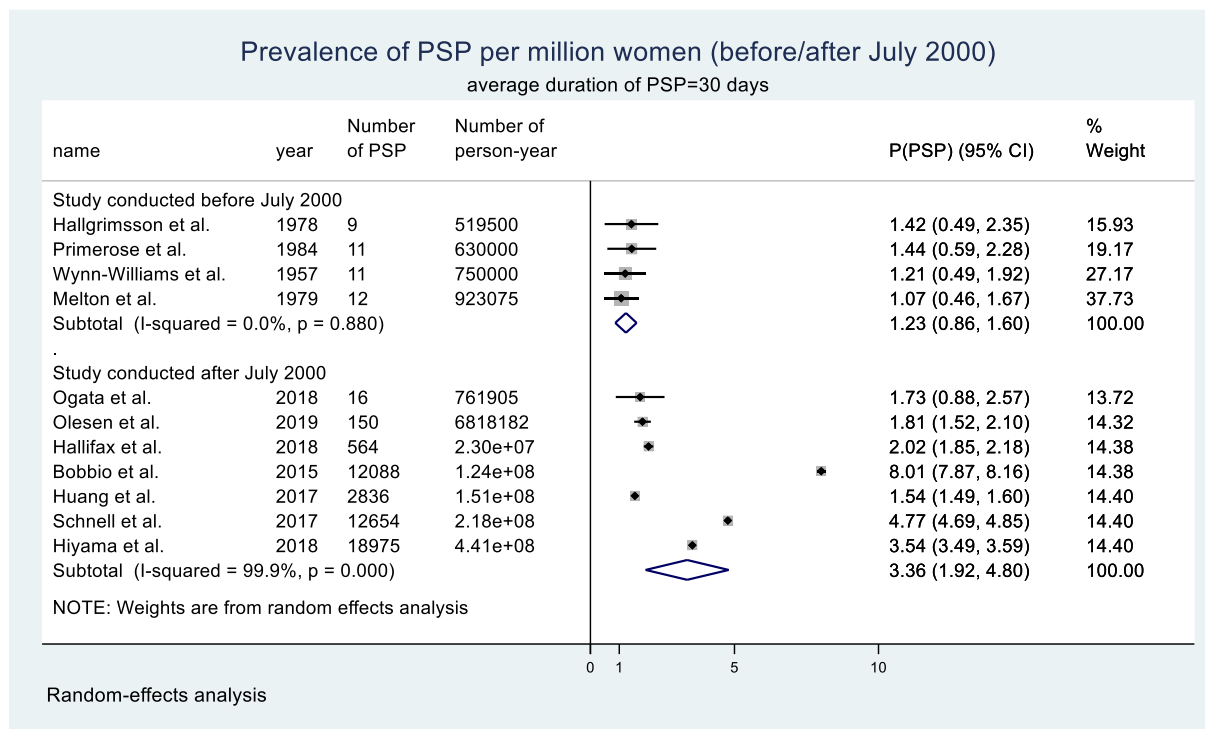

Supplementary figure S 12. Prevalence of apparent PSP in women with S-LAM, with average duration of PSP of 30 days, random-effects model.

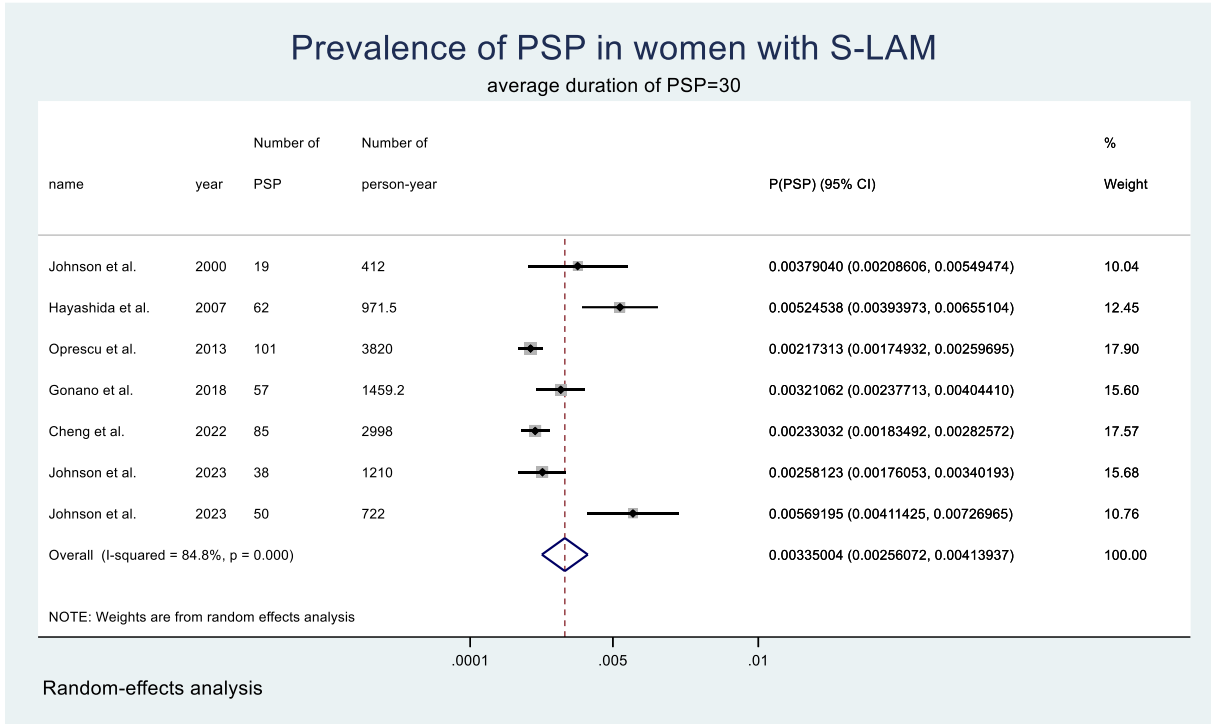

Supplement: MOESM1 [file 25582650]
